# Supplementary material
Source: publisher figshare collection journal article supplement (https://gsajournals.figshare.com/articles/dataset/_/11888910)
Supplement: Supplementary file 1 [file 1]

## Sheet: Sirt4 strains
Strain	mtDNA	Genotype	Treatment	O2Normalized	CO2normalized	RQnormalized
OreR	melanogaster	w1118	Standard	1	1	1
OreR	melanogaster	w1118	Rapa	0.7954	0.785266	0.987259
OreR	melanogaster	sirt4white+1	Standard	0.964671	0.939657	0.97407
OreR	melanogaster	sirt4white+1	Rapa	0.783525	0.736724	0.940268
OreR	melanogaster	w1118	Standard	0.860322	0.913426	1.06173
OreR	melanogaster	w1118	Rapa	0.813903	0.777237	0.954951
OreR	melanogaster	sirt4white+1	Standard	0.900529	0.935999	1.03939
OreR	melanogaster	sirt4white+1	Rapa	0.805438	0.761474	0.945415
OreR	melanogaster	w1118	Standard	1.00825	1.0282	1.01979
OreR	melanogaster	w1118	Rapa	0.850741	0.806355	0.947827
OreR	melanogaster	sirt4white+1	Standard	0.753957	0.749415	0.993975
OreR	melanogaster	sirt4white+1	Rapa	0.797182	0.740572	0.928986
SI1	simulans	w1118	Rapa	0.881403	0.823108	0.933861
SI1	simulans	sirt4white+1	Standard	1.09075	1.10968	1.01735
SI1	simulans	sirt4white+1	Rapa	0.918633	0.846837	0.921844
SI1	simulans	w1118	Rapa	0.820578	0.765697	0.933119
SI1	simulans	sirt4white+1	Standard	0.937381	0.994396	1.06082
SI1	simulans	sirt4white+1	Rapa	0.728764	0.661127	0.907188
SI1	simulans	w1118	Standard	0.900859	0.932764	1.03542
SI1	simulans	w1118	Rapa	0.734898	0.691041	0.940322
SI1	simulans	sirt4white+1	Standard	0.951003	0.932471	0.980513
SI1	simulans	sirt4white+1	Rapa	0.808845	0.733945	0.907399
OreR	melanogaster	w1118	Standard	1	1	1
OreR	melanogaster	w1118	Rapa	0.919085	0.852482	0.927533
OreR	melanogaster	sirt4white+1	Standard	0.835476	0.842273	1.00814
OreR	melanogaster	sirt4white+1	Rapa	0.877932	0.790555	0.900474
OreR	melanogaster	w1118	Standard	0.918355	0.931343	1.01414
OreR	melanogaster	w1118	Rapa	0.96343	0.925245	0.960366
OreR	melanogaster	sirt4white+1	Standard	0.937886	0.910878	0.971203
OreR	melanogaster	sirt4white+1	Rapa	0.877031	0.8001	0.912282
OreR	melanogaster	w1118	Standard	0.975622	0.955332	0.979203
OreR	melanogaster	w1118	Rapa	0.99394	0.91456	0.920136
OreR	melanogaster	sirt4white+1	Standard	0.839985	0.788836	0.939107
OreR	melanogaster	sirt4white+1	Rapa	0.846864	0.764407	0.902632
SI1	simulans	w1118	Standard	1.06948	1.02878	0.961945
SI1	simulans	w1118	Rapa	0.932339	0.873472	0.936861
SI1	simulans	sirt4white+1	Standard	1.183	1.16968	0.988742
SI1	simulans	sirt4white+1	Rapa	0.911031	0.818562	0.8985
SI1	simulans	w1118	Standard	0.662365	0.745378	1.12533
SI1	simulans	w1118	Rapa	0.919728	0.796008	0.865481
SI1	simulans	sirt4white+1	Standard	0.959301	0.95169	0.992067
SI1	simulans	sirt4white+1	Rapa	0.856179	0.740243	0.864589
SI1	simulans	w1118	Standard	0.869343	0.834643	0.960085
SI1	simulans	w1118	Rapa	0.827261	0.70897	0.857008
SI1	simulans	sirt4white+1	Standard	0.985716	0.919163	0.932483
SI1	simulans	sirt4white+1	Rapa	0.804807	0.68883	0.855894
OreR	melanogaster	w1118	Standard	1	1	1
OreR	melanogaster	w1118	Rapa	0.738837	0.720237	0.974826
OreR	melanogaster	sirt4white+1	Standard	1.05621	1.08869	1.03074
OreR	melanogaster	sirt4white+1	Rapa	0.599928	0.584325	0.973992
OreR	melanogaster	w1118	Standard	0.809471	0.855152	1.05643
OreR	melanogaster	w1118	Rapa	0.557677	0.552765	0.991192
OreR	melanogaster	sirt4white+1	Standard	0.879126	0.908333	1.03322
OreR	melanogaster	sirt4white+1	Rapa	0.68982	0.652727	0.946228
OreR	melanogaster	w1118	Standard	0.874952	0.903525	1.03266
OreR	melanogaster	w1118	Rapa	0.720197	0.664955	0.923296
OreR	melanogaster	sirt4white+1	Standard	0.798067	0.806602	1.01069
OreR	melanogaster	sirt4white+1	Rapa	0.701188	0.689631	0.983518
SI1	simulans	w1118	Standard	0.709375	0.743699	1.04839
SI1	simulans	w1118	Rapa	0.671208	0.65771	0.979891
SI1	simulans	sirt4white+1	Rapa	0.618009	0.589162	0.953322
SI1	simulans	w1118	Standard	0.758496	0.810466	1.06852
SI1	simulans	w1118	Rapa	0.614418	0.597851	0.973036
SI1	simulans	sirt4white+1	Standard	0.782603	0.819418	1.04704
SI1	simulans	sirt4white+1	Rapa	0.637583	0.611284	0.958753
SI1	simulans	w1118	Standard	0.788698	0.822458	1.0428
SI1	simulans	w1118	Rapa	0.578851	0.544412	0.940506
SI1	simulans	sirt4white+1	Rapa	0.584648	0.53548	0.915902
OreR	melanogaster	w1118	Standard	1	1	1
OreR	melanogaster	w1118	Rapa	0.832497	0.88619	1.0645
OreR	melanogaster	sirt4white+1	Standard	0.958387	1.04208	1.08733
OreR	melanogaster	sirt4white+1	Rapa	1.0422	0.987166	0.947196
OreR	melanogaster	w1118	Standard	1.06128	1.07083	1.009
OreR	melanogaster	w1118	Rapa	0.71264	0.740311	1.03883
OreR	melanogaster	sirt4white+1	Standard	0.86518	0.995246	1.15033
OreR	melanogaster	sirt4white+1	Rapa	0.834045	0.920086	1.10316
OreR	melanogaster	w1118	Standard	0.823208	0.889858	1.08096
OreR	melanogaster	w1118	Rapa	0.729425	0.772637	1.05924
OreR	melanogaster	sirt4white+1	Standard	0.823208	0.879266	1.0681
OreR	melanogaster	sirt4white+1	Rapa	0.901147	0.893849	0.991902
Sm21	simulans	w1118	Standard	0.997712	1.00302	1.00532
Sm21	simulans	w1118	Rapa	0.938818	0.920031	0.979989
Sm21	simulans	sirt4white+1	Standard	0.825243	0.870977	1.05542
Sm21	simulans	sirt4white+1	Rapa	0.877347	0.882506	1.00588
Sm21	simulans	w1118	Standard	1.02688	0.999363	0.973199
Sm21	simulans	w1118	Rapa	0.735788	0.744758	1.01219
Sm21	simulans	sirt4white+1	Standard	1.07729	1.09051	1.01227
Sm21	simulans	sirt4white+1	Rapa	0.737278	0.771855	1.0469
Sm21	simulans	w1118	Standard	0.667226	0.747793	1.12075
Sm21	simulans	w1118	Rapa	0.873954	0.856061	0.979527
Sm21	simulans	sirt4white+1	Standard	0.85717	0.88341	1.03061
Sm21	simulans	sirt4white+1	Rapa	0.568393	0.632608	1.11298
OreR	melanogaster	w1118	Standard	1	1	1
OreR	melanogaster	w1118	Rapa	0.833654	0.828201	0.993459
OreR	melanogaster	sirt4white+1	Standard	1.17518	1.31203	1.11645
OreR	melanogaster	sirt4white+1	Rapa	1.08434	1.25474	1.15715
OreR	melanogaster	w1118	Standard	0.987107	0.98595	0.998828
OreR	melanogaster	w1118	Rapa	0.736649	0.76984	1.04506
OreR	melanogaster	sirt4white+1	Standard	0.937346	1.10943	1.18359
OreR	melanogaster	sirt4white+1	Rapa	0.777609	0.860824	1.10701
OreR	melanogaster	w1118	Standard	0.851606	0.834276	0.97965
OreR	melanogaster	w1118	Rapa	0.830348	0.803526	0.967698
OreR	melanogaster	sirt4white+1	Standard	1.14216	1.25687	1.10044
OreR	melanogaster	sirt4white+1	Rapa	0.833225	1.03049	1.23675
Sm21	simulans	w1118	Standard	0.908379	0.920482	1.01332
Sm21	simulans	w1118	Rapa	0.835847	0.843222	1.00882
Sm21	simulans	sirt4white+1	Standard	0.946537	0.959001	1.01317
Sm21	simulans	sirt4white+1	Rapa	0.98986	0.997961	1.00818
Sm21	simulans	w1118	Standard	1.02894	1.04291	1.01357
Sm21	simulans	w1118	Rapa	0.781435	0.795946	1.01857
Sm21	simulans	sirt4white+1	Standard	0.931823	0.95001	1.01952
Sm21	simulans	sirt4white+1	Rapa	0.900296	0.963388	1.07008
Sm21	simulans	w1118	Standard	0.632085	0.747639	1.18281
Sm21	simulans	w1118	Rapa	0.923058	0.953313	1.03278
Sm21	simulans	sirt4white+1	Standard	0.854698	0.894072	1.04607
Sm21	simulans	sirt4white+1	Rapa	0.655943	0.702814	1.07146
OreR	melanogaster	w1118	Standard	1	1	1
OreR	melanogaster	w1118	Rapa	0.932974	0.889772	0.953694
OreR	melanogaster	sirt4white+1	Standard	1.05071	1.03276	0.982921
OreR	melanogaster	sirt4white+1	Rapa	0.903439	0.856804	0.948381
OreR	melanogaster	w1118	Standard	0.865963	0.811041	0.936577
OreR	melanogaster	w1118	Rapa	0.796352	0.742072	0.931839
OreR	melanogaster	sirt4white+1	Standard	0.904841	0.807321	0.892225
OreR	melanogaster	sirt4white+1	Rapa	0.955276	0.846301	0.885923
OreR	melanogaster	w1118	Standard	0.967488	0.896436	0.92656
OreR	melanogaster	w1118	Rapa	0.680234	0.640381	0.941413
OreR	melanogaster	sirt4white+1	Standard	0.826153	0.710508	0.86002
OreR	melanogaster	sirt4white+1	Rapa	0.837853	0.768008	0.916638
Sm21	simulans	w1118	Standard	1.02136	0.951799	0.93189
Sm21	simulans	w1118	Rapa	0.845634	0.833176	0.985268
Sm21	simulans	sirt4white+1	Standard	1.09262	0.962054	0.880501
Sm21	simulans	sirt4white+1	Rapa	0.980696	0.842629	0.859215
Sm21	simulans	w1118	Standard	1.14269	1.01097	0.884722
Sm21	simulans	w1118	Rapa	0.970055	0.901784	0.929621
Sm21	simulans	sirt4white+1	Standard	1.01868	0.905799	0.889188
Sm21	simulans	sirt4white+1	Rapa	0.996605	0.848563	0.851454
Sm21	simulans	w1118	Standard	0.977684	0.905964	0.926643
Sm21	simulans	w1118	Rapa	1.05557	0.992985	0.94071
Sm21	simulans	sirt4white+1	Standard	1.11648	0.973058	0.871544
Sm21	simulans	sirt4white+1	Rapa	0.692035	0.695136	1.00448
OreR	melanogaster	w1118	Standard	1	1	1
OreR	melanogaster	w1118	Rapa	0.968464	0.952254	0.983263
OreR	melanogaster	sirt4white+1	Standard	0.841772	0.816856	0.970401
OreR	melanogaster	sirt4white+1	Rapa	0.636958	0.630821	0.990366
OreR	melanogaster	w1118	Standard	0.938061	0.88022	0.938339
OreR	melanogaster	w1118	Rapa	0.852826	0.837277	0.981767
OreR	melanogaster	sirt4white+1	Standard	0.769962	0.733413	0.952532
OreR	melanogaster	sirt4white+1	Rapa	0.7361	0.674147	0.915836
OreR	melanogaster	w1118	Standard	0.901855	0.83612	0.927112
OreR	melanogaster	w1118	Rapa	0.645177	0.66163	1.0255
OreR	melanogaster	sirt4white+1	Standard	0.767661	0.745494	0.971123
OreR	melanogaster	sirt4white+1	Rapa	0.869866	0.786976	0.90471
Sm21	simulans	w1118	Standard	0.894485	0.840438	0.939578
Sm21	simulans	w1118	Rapa	0.928571	0.911496	0.981612
Sm21	simulans	sirt4white+1	Standard	1.06051	1.01274	0.954949
Sm21	simulans	sirt4white+1	Rapa	1.05435	1.01657	0.964168
Sm21	simulans	w1118	Standard	0.925934	0.839208	0.906337
Sm21	simulans	w1118	Rapa	0.813848	0.827453	1.01672
Sm21	simulans	sirt4white+1	Standard	0.876265	0.80752	0.921547
Sm21	simulans	sirt4white+1	Rapa	0.942427	0.881587	0.935443
Sm21	simulans	w1118	Standard	0.904683	0.821778	0.90836
Sm21	simulans	w1118	Rapa	0.919183	0.869855	0.946335
Sm21	simulans	sirt4white+1	Standard	1.05914	1.03165	0.974041
Sm21	simulans	sirt4white+1	Rapa	0.680096	0.702272	1.03261
OreR	melanogaster	w1118	Standard	1	1	1
OreR	melanogaster	w1118	Rapa	0.902347	0.949834	1.05263
OreR	melanogaster	sirt4white+1	Standard	0.875253	0.85145	0.972805
OreR	melanogaster	sirt4white+1	Rapa	0.646246	0.663833	1.02721
OreR	melanogaster	w1118	Standard	0.961927	0.967691	1.00599
OreR	melanogaster	w1118	Rapa	0.773134	0.762241	0.985911
OreR	melanogaster	sirt4white+1	Standard	0.87131	0.87046	0.999025
OreR	melanogaster	sirt4white+1	Rapa	0.598518	0.621061	1.03766
OreR	melanogaster	w1118	Standard	0.955131	0.908325	0.950995
OreR	melanogaster	w1118	Rapa	0.775334	0.772702	0.996605
OreR	melanogaster	sirt4white+1	Standard	0.781894	0.73257	0.936917
OreR	melanogaster	sirt4white+1	Rapa	0.567454	0.606045	1.06801
Zim53	melanogaster	w1118	Standard	1.0283	1.00813	0.980385
Zim53	melanogaster	w1118	Rapa	0.788066	0.802964	1.0189
Zim53	melanogaster	sirt4white+1	Standard	0.891106	0.982689	1.10277
Zim53	melanogaster	sirt4white+1	Rapa	0.657592	0.724247	1.10136
Zim53	melanogaster	w1118	Standard	0.852287	0.850849	0.998312
Zim53	melanogaster	w1118	Rapa	0.749366	0.740401	0.988037
Zim53	melanogaster	sirt4white+1	Standard	0.853833	0.972384	1.13885
Zim53	melanogaster	sirt4white+1	Rapa	0.671162	0.739058	1.10116
Zim53	melanogaster	w1118	Standard	0.840098	0.854824	1.01753
Zim53	melanogaster	w1118	Rapa	0.736349	0.766225	1.04057
Zim53	melanogaster	sirt4white+1	Standard	0.632928	0.710301	1.12225
Zim53	melanogaster	sirt4white+1	Rapa	0.589161	0.694438	1.17869
OreR	melanogaster	w1118	Standard	1	1	1
OreR	melanogaster	w1118	Rapa	0.857218	0.833711	0.972578
OreR	melanogaster	sirt4white+1	Standard	0.93332	0.909091	0.97404
OreR	melanogaster	sirt4white+1	Rapa	0.855714	0.829406	0.969256
OreR	melanogaster	w1118	Standard	0.935723	0.940439	1.00504
OreR	melanogaster	w1118	Rapa	0.798875	0.839474	1.05082
OreR	melanogaster	sirt4white+1	Standard	0.892341	0.89826	1.00663
OreR	melanogaster	sirt4white+1	Rapa	0.806793	0.768156	0.952111
OreR	melanogaster	w1118	Standard	0.823761	0.849256	1.03095
OreR	melanogaster	w1118	Rapa	0.934838	0.959229	1.02609
OreR	melanogaster	sirt4white+1	Standard	0.880665	0.836798	0.95019
OreR	melanogaster	sirt4white+1	Rapa	0.816325	0.723343	0.886097
Zim53	melanogaster	w1118	Standard	0.866102	0.830808	0.95925
Zim53	melanogaster	w1118	Rapa	0.959719	1.03647	1.07998
Zim53	melanogaster	sirt4white+1	Standard	0.909402	0.888216	0.976703
Zim53	melanogaster	sirt4white+1	Rapa	0.80264	0.858302	1.06935
Zim53	melanogaster	w1118	Standard	0.987742	0.987086	0.999335
Zim53	melanogaster	w1118	Rapa	0.924895	0.919259	0.993907
Zim53	melanogaster	sirt4white+1	Standard	1.00852	0.978001	0.969741
Zim53	melanogaster	sirt4white+1	Rapa	0.817908	0.849554	1.03869
Zim53	melanogaster	w1118	Standard	1.01695	0.966569	0.950455
Zim53	melanogaster	w1118	Rapa	1.00199	0.962315	0.960408
Zim53	melanogaster	sirt4white+1	Standard	0.763758	0.823889	1.07873
Zim53	melanogaster	sirt4white+1	Rapa	0.599278	0.586113	0.978032
OreR	melanogaster	w1118	Standard	1	1	1
OreR	melanogaster	w1118	Rapa	1.05238	0.909439	0.864172
OreR	melanogaster	sirt4white+1	Standard	1.14648	1.11894	0.975979
OreR	melanogaster	sirt4white+1	Rapa	1.00588	0.988121	0.982344
OreR	melanogaster	w1118	Standard	1.19808	1.02891	0.858796
OreR	melanogaster	w1118	Rapa	0.987653	0.886626	0.89771
OreR	melanogaster	sirt4white+1	Standard	0.982815	0.918469	0.934529
OreR	melanogaster	sirt4white+1	Rapa	1.01412	0.93295	0.919963
OreR	melanogaster	w1118	Standard	1.10419	1.04784	0.948969
OreR	melanogaster	w1118	Rapa	0.955327	0.846268	0.885841
OreR	melanogaster	sirt4white+1	Standard	0.974953	0.902108	0.925284
OreR	melanogaster	sirt4white+1	Rapa	0.900749	0.786379	0.873027
Zim53	melanogaster	w1118	Standard	0.974744	0.88217	0.905027
Zim53	melanogaster	w1118	Rapa	0.947342	0.948993	1.00174
Zim53	melanogaster	sirt4white+1	Standard	1.10406	1.06939	0.968595
Zim53	melanogaster	sirt4white+1	Rapa	0.939596	0.894435	0.951937
Zim53	melanogaster	w1118	Standard	1.07026	0.940399	0.878666
Zim53	melanogaster	w1118	Rapa	0.989669	0.895841	0.905192
Zim53	melanogaster	sirt4white+1	Standard	1.074	1.02179	0.951391
Zim53	melanogaster	sirt4white+1	Rapa	0.956429	0.920946	0.962901
Zim53	melanogaster	w1118	Standard	1.0128	0.907044	0.895583
Zim53	melanogaster	w1118	Rapa	0.946748	0.872031	0.921081
Zim53	melanogaster	sirt4white+1	Standard	0.820719	0.817903	0.99657
Zim53	melanogaster	sirt4white+1	Rapa	0.713214	0.734571	1.02994
OreR	melanogaster	w1118	Standard	1	1	1
OreR	melanogaster	w1118	Rapa	1.01181	1.02625	1.01427
OreR	melanogaster	sirt4white+1	Standard	0.934477	0.92966	0.994844
OreR	melanogaster	sirt4white+1	Rapa	0.847673	0.840805	0.991898
OreR	melanogaster	w1118	Standard	0.972499	0.950969	0.977861
OreR	melanogaster	w1118	Rapa	1.03249	0.980604	0.949744
OreR	melanogaster	sirt4white+1	Standard	1.00745	1.02516	1.01758
OreR	melanogaster	sirt4white+1	Rapa	0.806025	0.773752	0.95996
OreR	melanogaster	w1118	Standard	0.951882	0.932629	0.979774
OreR	melanogaster	w1118	Rapa	0.909662	0.917948	1.00911
OreR	melanogaster	sirt4white+1	Standard	0.735778	0.7847	1.06649
OreR	melanogaster	sirt4white+1	Rapa	0.829259	0.808514	0.974983
Zim53	melanogaster	w1118	Standard	0.760898	0.739303	0.971619
Zim53	melanogaster	w1118	Rapa	0.719796	0.713412	0.991131
Zim53	melanogaster	sirt4white+1	Standard	0.866406	0.879653	1.01529
Zim53	melanogaster	sirt4white+1	Rapa	0.844074	0.829639	0.982897
Zim53	melanogaster	w1118	Standard	0.668433	0.681457	1.01948
Zim53	melanogaster	w1118	Rapa	0.818856	0.815918	0.996412
Zim53	melanogaster	sirt4white+1	Standard	0.879771	0.85526	0.972139
Zim53	melanogaster	sirt4white+1	Rapa	0.841635	0.814737	0.968041
Zim53	melanogaster	w1118	Standard	0.875466	0.830766	0.948942
Zim53	melanogaster	w1118	Rapa	0.74699	0.750413	1.00458
Zim53	melanogaster	sirt4white+1	Standard	0.690036	0.730433	1.05854
Zim53	melanogaster	sirt4white+1	Rapa	0.73231	0.75646	1.03298

## Sheet: Wildtype strains
Strain	mtDNA	Genotype	Condition	O2normalized
OreR	melanogaster	wildtype	Standard	1
OreR	melanogaster	wildtype	Starvation	0.692191
OreR	melanogaster	wildtype	Rapa	0.571207
OreR	melanogaster	wildtype	Standard	0.922848
OreR	melanogaster	wildtype	Starvation	0.613649
OreR	melanogaster	wildtype	Rapa	0.992481
OreR	melanogaster	wildtype	Standard	0.548605
OreR	melanogaster	wildtype	Starvation	0.730539
OreR	melanogaster	wildtype	Rapa	0.569782
OreR	melanogaster	wildtype	Standard	0.832595
OreR	melanogaster	wildtype	Starvation	0.631032
OreR	melanogaster	wildtype	Rapa	0.631544
OreR	melanogaster	wildtype	Standard	0.784075
OreR	melanogaster	wildtype	Starvation	0.566065
OreR	melanogaster	wildtype	Rapa	0.601499
OreR	melanogaster	wildtype	Standard	0.814664
OreR	melanogaster	wildtype	Starvation	0.615944
OreR	melanogaster	wildtype	Rapa	0.529846
Zim53	melanogaster	wildtype	Standard	1
Zim53	melanogaster	wildtype	Starvation	0.794979
Zim53	melanogaster	wildtype	Rapa	0.537513
Zim53	melanogaster	wildtype	Standard	1.22297
Zim53	melanogaster	wildtype	Starvation	0.714665
Zim53	melanogaster	wildtype	Rapa	0.401404
Zim53	melanogaster	wildtype	Standard	0.963983
Zim53	melanogaster	wildtype	Starvation	0.673624
Zim53	melanogaster	wildtype	Rapa	0.367593
Zim53	melanogaster	wildtype	Standard	2.01348
Zim53	melanogaster	wildtype	Starvation	0.448021
Zim53	melanogaster	wildtype	Rapa	0.147382
Zim53	melanogaster	wildtype	Standard	0.981011
Zim53	melanogaster	wildtype	Starvation	0.732353
Zim53	melanogaster	wildtype	Rapa	0.573174
Zim53	melanogaster	wildtype	Standard	0.713865
Zim53	melanogaster	wildtype	Starvation	0.777453
Zim53	melanogaster	wildtype	Rapa	0.558076
Zim53	melanogaster	wildtype	Standard	1
Zim53	melanogaster	wildtype	Rapa	0.877229
Zim53	melanogaster	wildtype	Starvation	0.820155
Zim53	melanogaster	wildtype	Standard	1.01278
Zim53	melanogaster	wildtype	Rapa	0.746797
Zim53	melanogaster	wildtype	Starvation	0.712905
Zim53	melanogaster	wildtype	Standard	0.965873
Zim53	melanogaster	wildtype	Rapa	0.764609
Zim53	melanogaster	wildtype	Starvation	0.651637
Zim53	melanogaster	wildtype	Standard	0.872588
Zim53	melanogaster	wildtype	Rapa	0.80036
Zim53	melanogaster	wildtype	Starvation	0.732603
Zim53	melanogaster	wildtype	Standard	0.7508
Zim53	melanogaster	wildtype	Rapa	0.792756
Zim53	melanogaster	wildtype	Starvation	0.678796
Zim53	melanogaster	wildtype	Standard	0.669997
Zim53	melanogaster	wildtype	Rapa	0.682896
Zim53	melanogaster	wildtype	Starvation	0.971267
C167.4	simulans	wildtype	Standard	1
C167.4	simulans	wildtype	Starvation	0.722986
C167.4	simulans	wildtype	Rapa	1.48692
C167.4	simulans	wildtype	Standard	0.865442
C167.4	simulans	wildtype	Starvation	0.91619
C167.4	simulans	wildtype	Rapa	1.04004
C167.4	simulans	wildtype	Standard	1.05107
C167.4	simulans	wildtype	Starvation	0.853414
C167.4	simulans	wildtype	Rapa	0.869977
C167.4	simulans	wildtype	Standard	1.18163
C167.4	simulans	wildtype	Starvation	0.930434
C167.4	simulans	wildtype	Rapa	1.25463
C167.4	simulans	wildtype	Standard	1.11444
C167.4	simulans	wildtype	Starvation	1.06815
C167.4	simulans	wildtype	Rapa	1.02557
C167.4	simulans	wildtype	Standard	0.899408
C167.4	simulans	wildtype	Starvation	0.861464
C167.4	simulans	wildtype	Rapa	1.14323
C167.4	simulans	wildtype	Standard	1
C167.4	simulans	wildtype	Starvation	1.23079
C167.4	simulans	wildtype	Rapa	1.39982
C167.4	simulans	wildtype	Standard	1.23397
C167.4	simulans	wildtype	Starvation	1.00156
C167.4	simulans	wildtype	Rapa	1.65865
C167.4	simulans	wildtype	Standard	1.10799
C167.4	simulans	wildtype	Starvation	1.31693
C167.4	simulans	wildtype	Rapa	1.20656
C167.4	simulans	wildtype	Standard	1.17983
C167.4	simulans	wildtype	Starvation	1.11638
C167.4	simulans	wildtype	Rapa	1.12828
C167.4	simulans	wildtype	Standard	1.00274
C167.4	simulans	wildtype	Starvation	1.11622
C167.4	simulans	wildtype	Rapa	1.38735
C167.4	simulans	wildtype	Standard	1.00811
C167.4	simulans	wildtype	Starvation	1.28169
C167.4	simulans	wildtype	Rapa	1.21658
C167.4	simulans	wildtype	Standard	1
C167.4	simulans	wildtype	Starvation	0.818402
C167.4	simulans	wildtype	Rapa	1.16331
C167.4	simulans	wildtype	Standard	0.71079
C167.4	simulans	wildtype	Starvation	0.645409
C167.4	simulans	wildtype	Rapa	0.957296
C167.4	simulans	wildtype	Standard	0.819075
C167.4	simulans	wildtype	Starvation	0.878066
C167.4	simulans	wildtype	Rapa	0.915248
C167.4	simulans	wildtype	Standard	0.609688
C167.4	simulans	wildtype	Starvation	0.88345
C167.4	simulans	wildtype	Rapa	0.898908
C167.4	simulans	wildtype	Standard	0.692211
C167.4	simulans	wildtype	Starvation	1.1423
C167.4	simulans	wildtype	Rapa	1.85633
C167.4	simulans	wildtype	Standard	0.885769
C167.4	simulans	wildtype	Starvation	0.788782
C167.4	simulans	wildtype	Rapa	1.05119
C167.4	simulans	wildtype	Starvation	0.0214072
C167.4	simulans	wildtype	Standard	1
C167.4	simulans	wildtype	Rapa	1.00622
C167.4	simulans	wildtype	Starvation	0.799593
C167.4	simulans	wildtype	Standard	0.814865
C167.4	simulans	wildtype	Rapa	1.19572
C167.4	simulans	wildtype	Starvation	1.105
C167.4	simulans	wildtype	Standard	0.988146
C167.4	simulans	wildtype	Rapa	1.19939
C167.4	simulans	wildtype	Starvation	1.06646
C167.4	simulans	wildtype	Standard	1.12787
C167.4	simulans	wildtype	Rapa	0.978249
C167.4	simulans	wildtype	Starvation	0.92264
C167.4	simulans	wildtype	Standard	0.879257
C167.4	simulans	wildtype	Rapa	0.886982
C167.4	simulans	wildtype	Starvation	0.949975
C167.4	simulans	wildtype	Standard	0.97725
C167.4	simulans	wildtype	Rapa	1.10308
C167.4	simulans	wildtype	Starvation	0.0864112
C167.4	simulans	wildtype	Standard	0.430945
C167.4	simulans	wildtype	Rapa	0.772299
C167.4	simulans	wildtype	Starvation	0.815518
C167.4	simulans	wildtype	Standard	1
C167.4	simulans	wildtype	Rapa	1.0815
C167.4	simulans	wildtype	Starvation	0.840323
C167.4	simulans	wildtype	Standard	0.915171
C167.4	simulans	wildtype	Rapa	0.823769
C167.4	simulans	wildtype	Starvation	0.786484
C167.4	simulans	wildtype	Standard	0.976556
C167.4	simulans	wildtype	Rapa	0.80675
C167.4	simulans	wildtype	Starvation	0.751075
C167.4	simulans	wildtype	Standard	0.841981
C167.4	simulans	wildtype	Rapa	0.855029
C167.4	simulans	wildtype	Starvation	0.96398
C167.4	simulans	wildtype	Standard	0.925774
C167.4	simulans	wildtype	Rapa	0.80583
Sm21	simulans	wildtype	Standard	1
Sm21	simulans	wildtype	Starvation	0.759778
Sm21	simulans	wildtype	Rapa	0.804257
Sm21	simulans	wildtype	Standard	0.786339
Sm21	simulans	wildtype	Starvation	0.949657
Sm21	simulans	wildtype	Rapa	0.718245
Sm21	simulans	wildtype	Standard	0.822949
Sm21	simulans	wildtype	Starvation	0.804157
Sm21	simulans	wildtype	Rapa	0.745672
Sm21	simulans	wildtype	Standard	0.900569
Sm21	simulans	wildtype	Starvation	0.965188
Sm21	simulans	wildtype	Rapa	0.581165
Sm21	simulans	wildtype	Standard	0.597637
Sm21	simulans	wildtype	Starvation	0.504604
Sm21	simulans	wildtype	Rapa	0.727131
Sm21	simulans	wildtype	Standard	0.784814
Sm21	simulans	wildtype	Starvation	0.623308
Sm21	simulans	wildtype	Rapa	0.690424
Sm21	simulans	wildtype	Starvation	0.552083
Sm21	simulans	wildtype	Rapa	0.823934
Sm21	simulans	wildtype	Standard	1
Sm21	simulans	wildtype	Starvation	0.407909
Sm21	simulans	wildtype	Rapa	1.01454
Sm21	simulans	wildtype	Standard	0.543642
Sm21	simulans	wildtype	Starvation	0.491966
Sm21	simulans	wildtype	Rapa	0.731016
Sm21	simulans	wildtype	Standard	0.573475
Sm21	simulans	wildtype	Starvation	0.428671
Sm21	simulans	wildtype	Rapa	0.889233
Sm21	simulans	wildtype	Standard	0.565758
Sm21	simulans	wildtype	Starvation	0.598783
Sm21	simulans	wildtype	Rapa	0.836533
Sm21	simulans	wildtype	Standard	0.395614
Sm21	simulans	wildtype	Starvation	0.457285
Sm21	simulans	wildtype	Rapa	0.696725
SI1	simulans	wildtype	Standard	1
SI1	simulans	wildtype	Starvation	0.915472
SI1	simulans	wildtype	Rapa	0.495704
SI1	simulans	wildtype	Standard	1.5965
SI1	simulans	wildtype	Starvation	0.891246
SI1	simulans	wildtype	Rapa	1.25434
SI1	simulans	wildtype	Standard	1.55876
SI1	simulans	wildtype	Starvation	0.98663
SI1	simulans	wildtype	Rapa	1.38208
SI1	simulans	wildtype	Standard	1.32284
SI1	simulans	wildtype	Starvation	1.1005
SI1	simulans	wildtype	Rapa	0.940484
SI1	simulans	wildtype	Standard	1.17794
SI1	simulans	wildtype	Starvation	0.960382
SI1	simulans	wildtype	Rapa	1.41792
SI1	simulans	wildtype	Standard	1.69558
SI1	simulans	wildtype	Starvation	0.960754
SI1	simulans	wildtype	Rapa	1.1712
